# Supplementary material for: Identifying latent genetic interactions in genome-wide association studies using multiple traits
Source: PubMed Central journal article supplement (PMC10515795; doi:10.1101/2023.09.11.557155), 2023-09-13
Supplement: NIHPP2023.09.11.557155V1-supplement-1.pdf [file NIHPP2023.09.11.557155V1-supplement-1.pdf]

## 771 5 Appendix

### 772 5.1 Testing for latent genetic interactions

773 To review the regression model from the Results section, suppose  $Y_{jk}$  depends on a biallelic locus  
 774 with genotype  $X_j$ , an unobserved (or latent) environmental variable  $M_j$ , and a latent genotype-by-  
 775 environment (GxE) interaction  $X_j M_j$  for  $j = 1, 2, \dots, n$  unrelated individuals with  $k = 1, 2, \dots, r$  mea-  
 776 surable traits. The regression model is expressed as

$$777 \quad Y_{jk} = \beta_k X_j + \phi_k M_j + \gamma_k X_j M_j + \epsilon_{jk}, \quad (\text{S1})$$

778 The left side of the equation are the trait values which are observable random variables. The right side  
 779 contains four components: the observable genotype  $X_j$  with effect size  $\beta_k$ ; an unobservable variable  
 780  $M_j$  with effect size  $\phi_k$ ; an unobservable interaction  $X_j M_j$  with effect size  $\gamma_k$ ; and an unobservable  
 781 random error  $\epsilon_{jk}$  with mean zero and variance  $\sigma_k^2$ . Without loss of generality, we assume that  $M_j$  is  
 782 mean zero with unit variance. Our inference goal is it to test whether  $\gamma_k = 0$  for  $k = 1, 2, \dots, r$  without  
 783 having to observe the latent environmental variable  $M_j$ .

784 The following sections are outlined as follows. We first show that a latent genetic interaction induces  
 785 trait variance and covariance patterns under the above model assumptions. We then review the distri-  
 786 butional theory behind the individual-level trait central cross moments. Using these results, we briefly  
 787 show how latent interactive effects can be detected within a regression model framework.

#### 788 5.1.1 Latent interactions induce differential variance and covariance patterns

789 We show in the main text that a latent interaction can be detected based on calculating the individual-  
 790 specific trait variances (ITV) and covariances (ITC). To construct these quantities, let  $e_{jk} = Y_{jk} -$   
 791  $\beta_k X_j$  denote the trait residuals after removing the additive genetic effect. For simplicity, assume the  
 792 effect sizes are known. For the  $j$ th individual, given the genotype  $X_j$ , the  $r \times r$  individual-specific trait  
 793 covariance matrix is

$$794 \quad \Sigma_j | X_j = \begin{bmatrix} \text{E}[e_{j1}^2 | X_j] & \text{E}[e_{j1}e_{j2} | X_j] & \cdots & \text{E}[e_{j1}e_{jr} | X_j] \\ \text{E}[e_{j2}e_{j1} | X_j] & \text{E}[e_{j2}^2 | X_j] & \cdots & \text{E}[e_{j2}e_{jr} | X_j] \\ \vdots & \vdots & \ddots & \vdots \\ \text{E}[e_{jr}e_{j1} | X_j] & \text{E}[e_{jr}e_{j2} | X_j] & \cdots & \text{E}[e_{jr}^2 | X_j] \end{bmatrix},$$

795 where the ITV are the  $r$  diagonal elements and ITC are the  $s = \binom{r}{2}$  off-diagonal elements.

796 The presence of a latent interaction shared by multiple traits induces differential ITV and ITC pat-  
 797 terns as a function of genotype. More specifically, given our model assumptions, the ITC between the

798  $k$ 'th and  $k'$ 'th trait is

$$\begin{aligned}
 \text{Cov}[Y_{jk}, Y_{jk'} \mid X_j] &= \text{E}[e_{jk}e_{jk'} \mid X_j] \\
 &= \text{E}[(\phi_k M_j + \gamma_k X_j M_j + \epsilon_{jk})(\phi_{k'} M_j + \gamma_{k'} X_j M_j + \epsilon_{jk'}) \mid X_j] \\
 &= \text{E}[\phi_k \phi_{k'} M_j^2 + (\phi_{k'} \gamma_k + \phi_k \gamma_{k'}) X_j M_j^2 + \gamma_{k'} \gamma_k X_j^2 M_j^2 \mid X_j] \\
 799 &+ \text{E}[\phi_k M_j \epsilon_{jk'} + \gamma_k X_j M_j \epsilon_{jk'} + \phi_{k'} M_j \epsilon_{jk} + \gamma_{k'} X_j M_j \epsilon_{jk} + \epsilon_{jk} \epsilon_{jk'} \mid X_j] \quad (\text{S2}) \\
 &= \text{E}[\phi_k \phi_{k'} M_j^2 + (\phi_{k'} \gamma_k + \phi_k \gamma_{k'}) X_j M_j^2 + \gamma_{k'} \gamma_k X_j^2 M_j^2 \mid X_j] \\
 &= (\phi_k \phi_{k'} + (\phi_{k'} \gamma_k + \phi_k \gamma_{k'}) X_j + \gamma_{k'} \gamma_k X_j^2) \text{E}[M_j^2 \mid X_j] \\
 &= \tilde{a}_{kk'} + \tilde{b}_{kk'} X_j + \tilde{c}_{kk'} X_j^2,
 \end{aligned}$$

800 where  $\tilde{a}_{kk'} = \phi_k \phi_{k'}$ ,  $\tilde{b}_{kk'} = \phi_k \gamma_{k'} + \phi_{k'} \gamma_k$ , and  $\tilde{c}_{kk'} = \gamma_k \gamma_{k'}$ . Note that the fourth line follows from  
 801 our assumption that the random errors of each trait are independent of each other, the genotype, and  
 802 the environmental variable, and so  $\text{E}[M_j \epsilon_{jk'} \mid X_j] = \text{E}[M_j \epsilon_{jk} \mid X_j] = \text{E}[\epsilon_{jk} \epsilon_{jk'} \mid X_j] = 0$ . The fifth  
 803 line follows from the assumption that the environmental variable  $M_j$  is mean zero with unit variance  
 804 and independent of the genotype, and so  $\text{E}[M_j \mid X_j] = \text{E}[M_j] = 0$  implying that  $\text{E}[M_j^2 \mid X_j] =$   
 805  $\text{Var}[M_j \mid X_j] + \text{E}[M_j \mid X_j]^2 = \text{Var}[M_j \mid X_j] = \text{Var}[M_j] = 1$ . Following similar steps as above, the ITV  
 806 is

$$\begin{aligned}
 \text{Var}[Y_{jk} \mid X_j] &= \text{E}[e_{jk}^2 \mid X_j] \\
 807 &= a_k + b_k X_j + c_k X_j^2, \quad (\text{S3})
 \end{aligned}$$

808 where  $a_k = \phi_k^2 + \sigma_k^2$ ,  $b_k = 2\phi_k \gamma_k$ , and  $c_k = \gamma_k^2$ . Thus, we have shown that a latent GxE interaction  
 809 will create differential trait variance and covariance patterns that depend on genotype. In particular,  
 810 a latent GxE interaction in trait  $k$  ( $\gamma_k \neq 0$ ) will induce a variance pattern that depends on genotype  
 811 (Equation S3), and also induce a covariance pattern between traits  $k$  and  $k'$  when there is a shared  
 812 interaction ( $\gamma_{k'} \neq 0$ ) or a shared interacting variable ( $\phi_{k'} \neq 0$ ; Equation S2).

813 Even though we limit our discussion to a single latent environmental effect and genotype, our re-  
 814 sults hold more generally under the polygenic trait model. Furthermore, while we consider a simple  
 815 interaction effect, it is straightforward to show that other complex latent signals involving the genotype  
 816 induce differential variance and covariance patterns. Although, the exact functional form may be more  
 817 complicated than above.

### 818 5.1.2 Distribution of the cross products

819 Following the above discussion, we describe the distribution for the cross product of two random vari-  
 820 ables that follow a Normal distribution. We then use this result to describe the sampling variability of  
 821 the cross product and squared residual terms within a regression model framework in the next section.

822 To simplify notation, let  $Y_1 \equiv Y_{j1}$  and  $Y_2 \equiv Y_{j2}$  denote the first two traits of the  $j$ th individual. With-  
 823 out loss of generality, suppose these traits are normally distributed with mean zero, unit variance, and  
 824 correlation coefficient  $\rho$ . The cross product term is denoted by  $Z = Y_1 Y_2$ .

825 The relationship between traits can be expressed as

$$826 \quad Y_2 = \rho Y_1 + \sqrt{1 - \rho^2} U, \quad (\text{S4})$$

827 where  $U \sim N(0, 1)$ . The cross product term is then

$$828 \quad \begin{aligned} Z &= Y_1(\rho Y_1 + \sqrt{1 - \rho^2} U) \\ &= \rho Y_1^2 + \sqrt{1 - \rho^2} Y_1 U, \end{aligned} \quad (\text{S5})$$

829 where  $Y_1^2 \sim \chi_1^2$  and  $Y_1 U \sim B_0$  where  $B_0$  is the modified Bessel distribution of the second kind of order  
 830 zero. For perfectly correlated variables,  $Z$  is distributed as a Chi-squared distribution with one degree of  
 831 freedom. Alternatively, for uncorrelated variables,  $Z$  follows a modified Bessel distribution of the second  
 832 kind of order zero. See ref. [69, 70] for the distribution of the product of two normal random variables.

833 The first two moments are

$$834 \quad \begin{aligned} E[Z] &= \rho \\ \text{Var}[Z] &= 1 + \rho^2, \end{aligned} \quad (\text{S6})$$

835 and, more generally, for mean centered traits with variances  $(\sigma_1^2, \sigma_2^2)$ , the first two moments are

$$836 \quad \begin{aligned} E[Z] &= \sigma_1 \sigma_2 \rho \\ \text{Var}[Z] &= \sigma_1^2 \sigma_2^2 (1 + \rho^2). \end{aligned} \quad (\text{S7})$$

837 We use this result in the next section to describe the heteroskedasticity in a regression model that treats  
 838 the cross products or squared residuals as outcome variables.

### 839 **5.1.3 Regression model for the cross products and squared residuals**

840 Using the central moments result, we first describe the regression model for the cross product terms.

841 Let  $P = \{(1, 2), (1, 3), \dots, (2, 3), (2, 4), \dots, (r - 1, r)\}$  denote the set of cross product pairs such that  
 842  $|P| = s$ . The first and second element of the  $q$ th cross product is  $P_{q1}$  and  $P_{q2}$ , respectively, and the  
 843 cross product between traits is  $Z_{jq}^{\text{CP}} = e_{j,P_{q1}} e_{j,P_{q2}}$ . The regression model is

$$844 \quad \begin{aligned} Z_{jq}^{\text{CP}} | X_j &= E[Z_{jq}^{\text{CP}} | X_j] + \epsilon_{jq} \\ Z_{jq}^{\text{CP}} | X_j &= \tilde{a}_q + \tilde{b}_q X_j + \tilde{c}_q X_j^2 + \epsilon_{jq}, \end{aligned} \quad (\text{S8})$$

845 where  $E[Z_{jq}^{\text{CP}} | X_j] = \text{Cov}[e_{j,P_{q1}}, e_{j,P_{q2}} | X_j]$  is expressed in Equation S2. The results in Section 5.1.2  
 846 can be used to describe the random error in the model: The error term  $\epsilon_{jq}$  is independent for  $j =$

847  $1, 2, \dots, n$  observations, but in general, is not normally distributed or identically distributed. Under the  
848 null hypothesis of no interactive effects, the errors are identically distributed.

849 We note that the above regression model differs from typical regression models in two ways. First,  
850 the random error does not follow a Normal distribution, although for typical large GWAS sample sizes,  
851 this should not impact inference. Second, under the alternative hypothesis where interactions exists,  
852 heteroskedasticity arises in the model. To see why, using the results from the previous section, the  
853 variance of the error term can be expressed as

$$854 \text{Var}[\epsilon_{jq} \mid X_j] = \sigma_{j, Y_{P_{q1}} | X_j}^2 \sigma_{j, Y_{P_{q2}} | X_j}^2 + \text{E}[Z_{jq}^{\text{CP}} \mid X_j]^2 \quad (\text{S9})$$

855 where  $\sigma_{j, Y_{P_{q1}} | X_j}^2 = (\phi_{P_{q1}} + \gamma_{P_{q1}} X_j)^2 + \sigma_{P_{q1}}^2$  and  $\sigma_{j, Y_{P_{q2}} | X_j}^2 = (\phi_{P_{q2}} + \gamma_{P_{q2}} X_j)^2 + \sigma_{P_{q2}}^2$ . Under the null  
856 hypothesis, if the heteroskedasticity is uncorrelated with the explanatory variables then there is type I  
857 error rate control. Therefore, controlling for sources of variation such as population structure and nearby  
858 SNPs with strong additive effects is important to avoid an inflated type I error rate. Finally, in addition to  
859 these sources of variation, an incorrect trait scaling will likely induce heteroskedasticity and also impact  
860 type I error rate control.

861 We briefly state the regression model using the ITV. For the ITV, we are modeling the change in  
862 variance of trait  $k$  as a function of  $X_j$ :

$$863 \begin{aligned} Z_{jk}^{\text{SQ}} \mid X_j &= \text{E}[Z_{jk}^{\text{SQ}} \mid X_j] + \epsilon'_{jk} \\ Z_{jk}^{\text{SQ}} \mid X_j &= a_k + b_k X_j + c_k X_j^2 + \epsilon'_{jk}, \end{aligned} \quad (\text{S10})$$

864 where  $\text{Var}[\epsilon'_{jk} \mid X_j] = 2\sigma_{Y_{jk} | X_j}^4$ . The ITVs are a special case of the ITCs when  $\rho = 1$ .

865 Thus far, we assumed that the effect sizes of the additive genetic term is known to simplify the  
866 theory. However, in practice, we use the residuals so the above theory does not exactly hold: while the  
867 studentized residuals are unbiased estimates, they follow a  $t$ -distribution and so the squared residuals  
868 follow an  $F$ -distribution (similar adjustments with the cross products). This nuance did not impact any  
869 inferences in our simulation study.

870 There are a few important details with the above regression model approach. First, a test for  
871 differential ITV patterns is related to the Breusch-Pagan test [21]. In addition, a regression model  
872 on the correlation scale has been discussed elsewhere (see, e.g., [71]) and, more recently, is related to  
873 one studied by Lea et al. (2019) [30]. Second, the quadratic relationship between the cross products (or  
874 squared residuals) and genotypes only holds for simple interactions, and the underlying (and unknown)  
875 functional form is expected to be more complicated. Regardless, for GWAS data where interactions are  
876 difficult to detect,  $c_q$  (or  $c_k$ ) is likely much smaller than  $b_q$  (or  $b_k$ ) and so it is reasonable to assume that  
877 the linear term will dominate the signal compared to higher order terms.

878 **5.2 Supplementary figures**

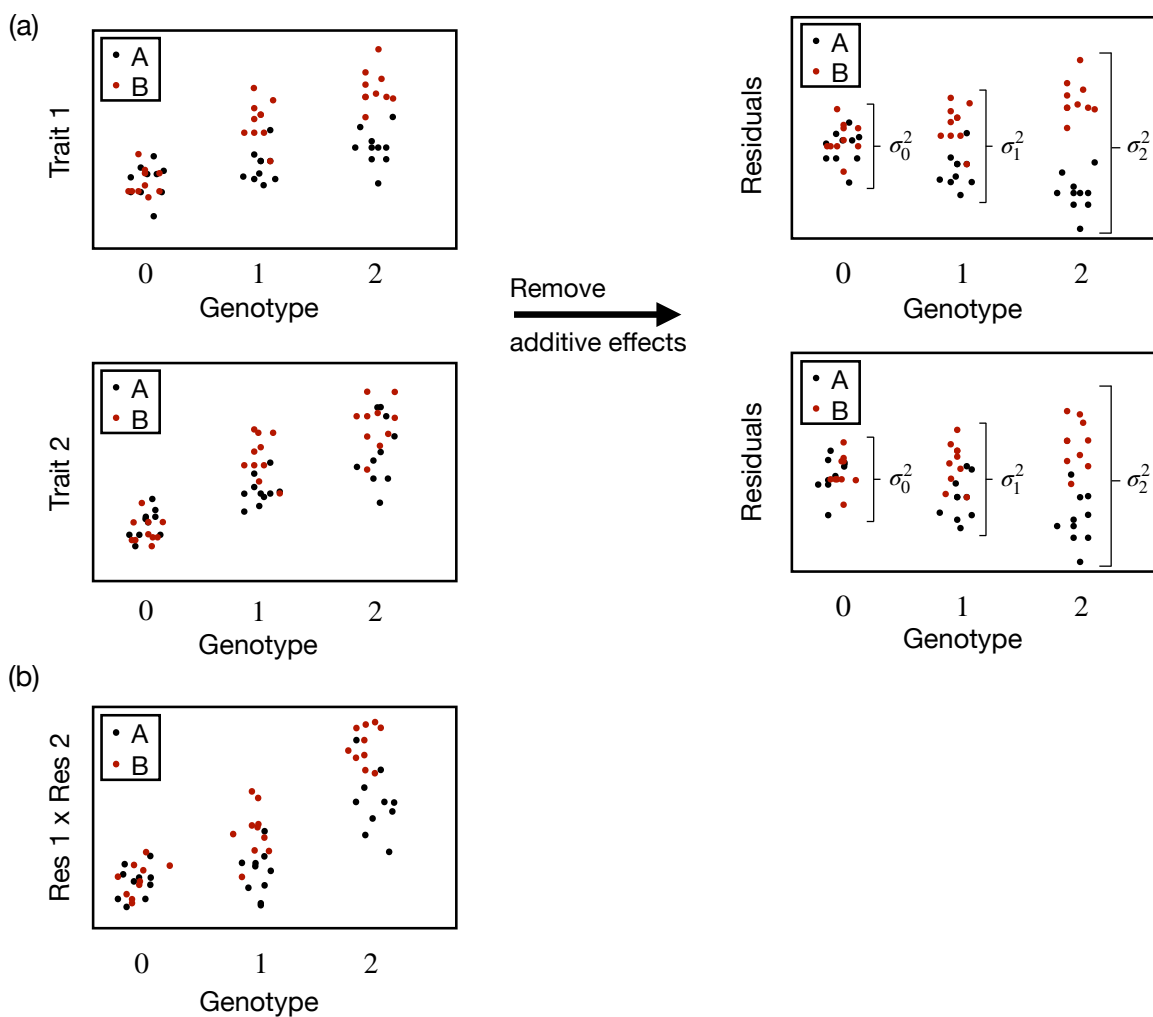

**Figure S1:** General strategy to detect latent genetic interactions when there are two unobserved environments denoted by 'A' and 'B.' (a) The additive genetic effect is removed and any heteroskedasticity correlated with genotype implies a latent genetic interaction. (b) When there are two traits measured, the pairwise products between the residuals (cross products) can be used to test for latent genetic effects.

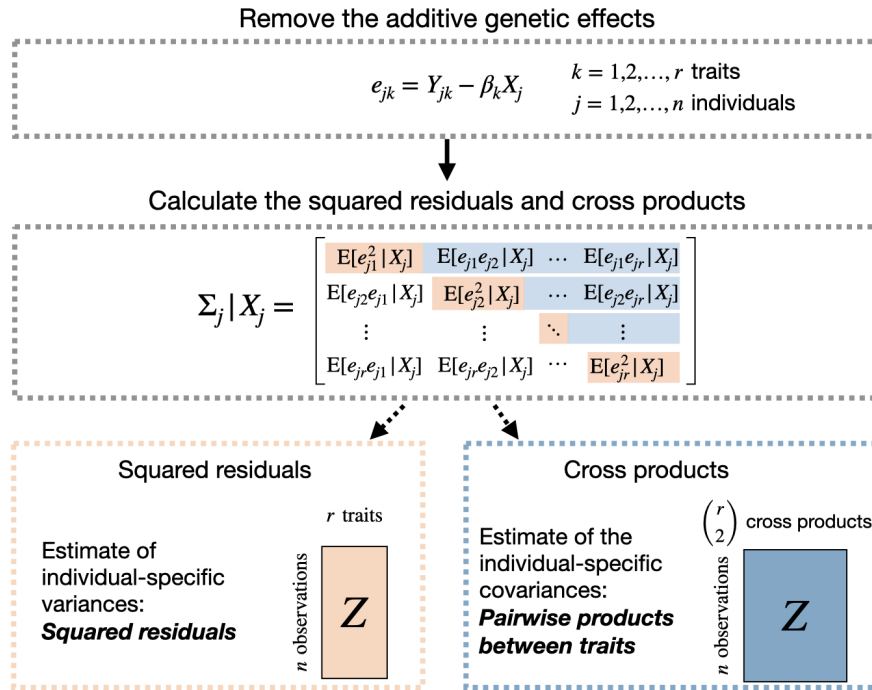

**Figure S2:** Revealing latent interactive effects using multiple traits. The first step is to remove the additive genetic signal to ensure that the covariance between traits is not caused by the main (additive) effects of the SNP. The individual-specific covariance matrix can then be estimated by calculating the corresponding squared residuals (estimate of the diagonal elements) and the cross products (estimate of the off-diagonal elements). These quantities can be used to infer latent interactive effects.

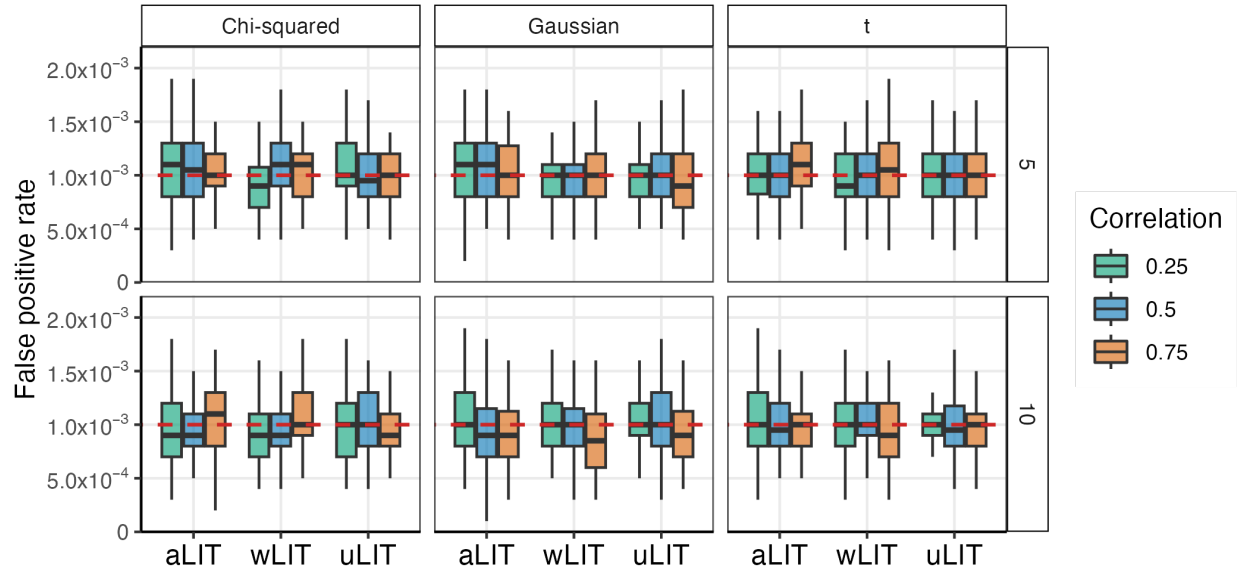

**Figure S3:** False positive rate of the LIT implementations under the null hypothesis of no interaction. Our simulation study varied the number of traits (rows), baseline trait correlation (0.25 (green), 0.50 (blue), and 0.75 (orange)), and error distribution (columns). For each configuration, there are 50 replicates at a sample size of 300,000. The empirical false positive rate at a type I error rate of  $1 \times 10^{-3}$  (red dashed line).

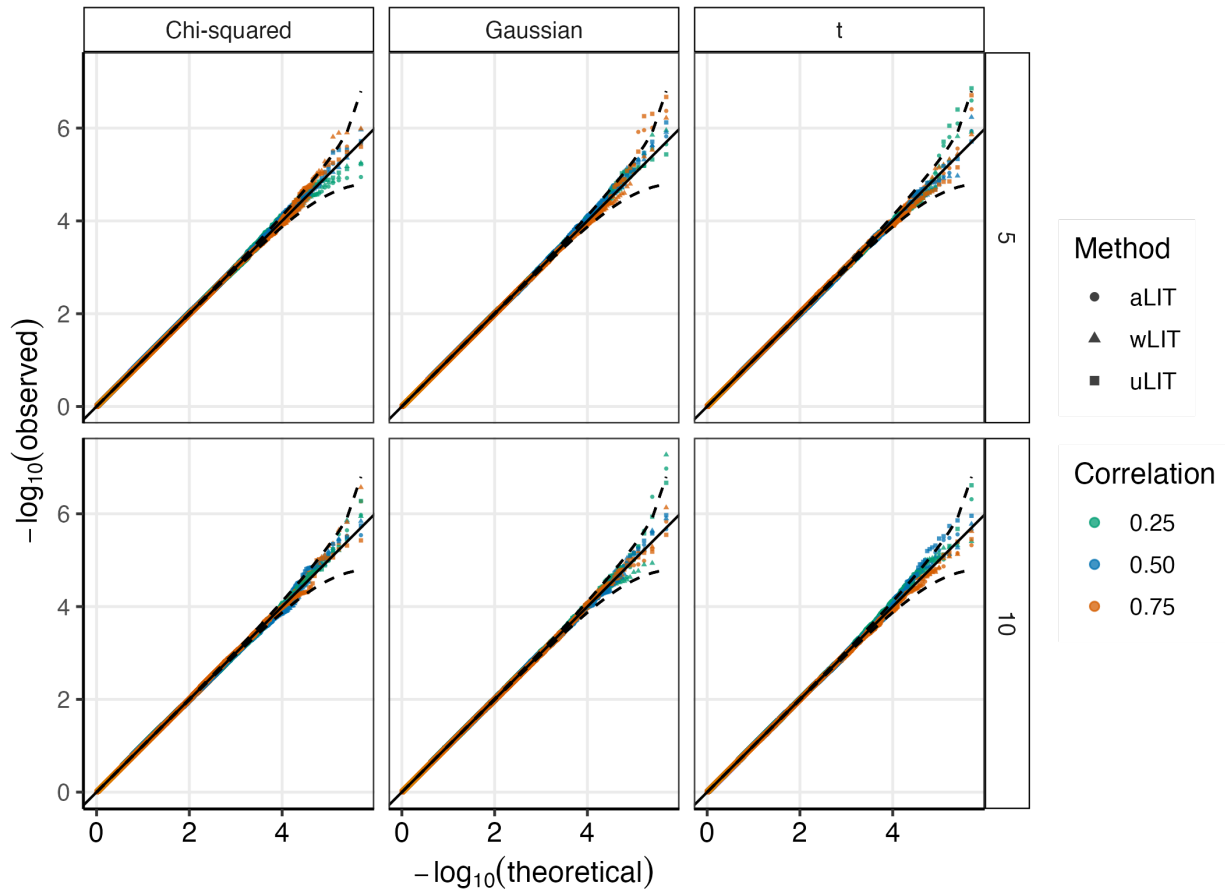

**Figure S4:** Q-Q plot of the LIT implementations under the null hypothesis of no interaction. Similar to Figure S3, our simulation study varied the number of traits (rows), baseline trait correlation (0.25 (green), 0.50 (blue), and 0.75 (orange)), and error distribution (columns). At each configuration, we simulated 50 datasets of 10,000 SNPs and then combined the  $p$ -values for a total of 500,000  $p$ -values per configuration.



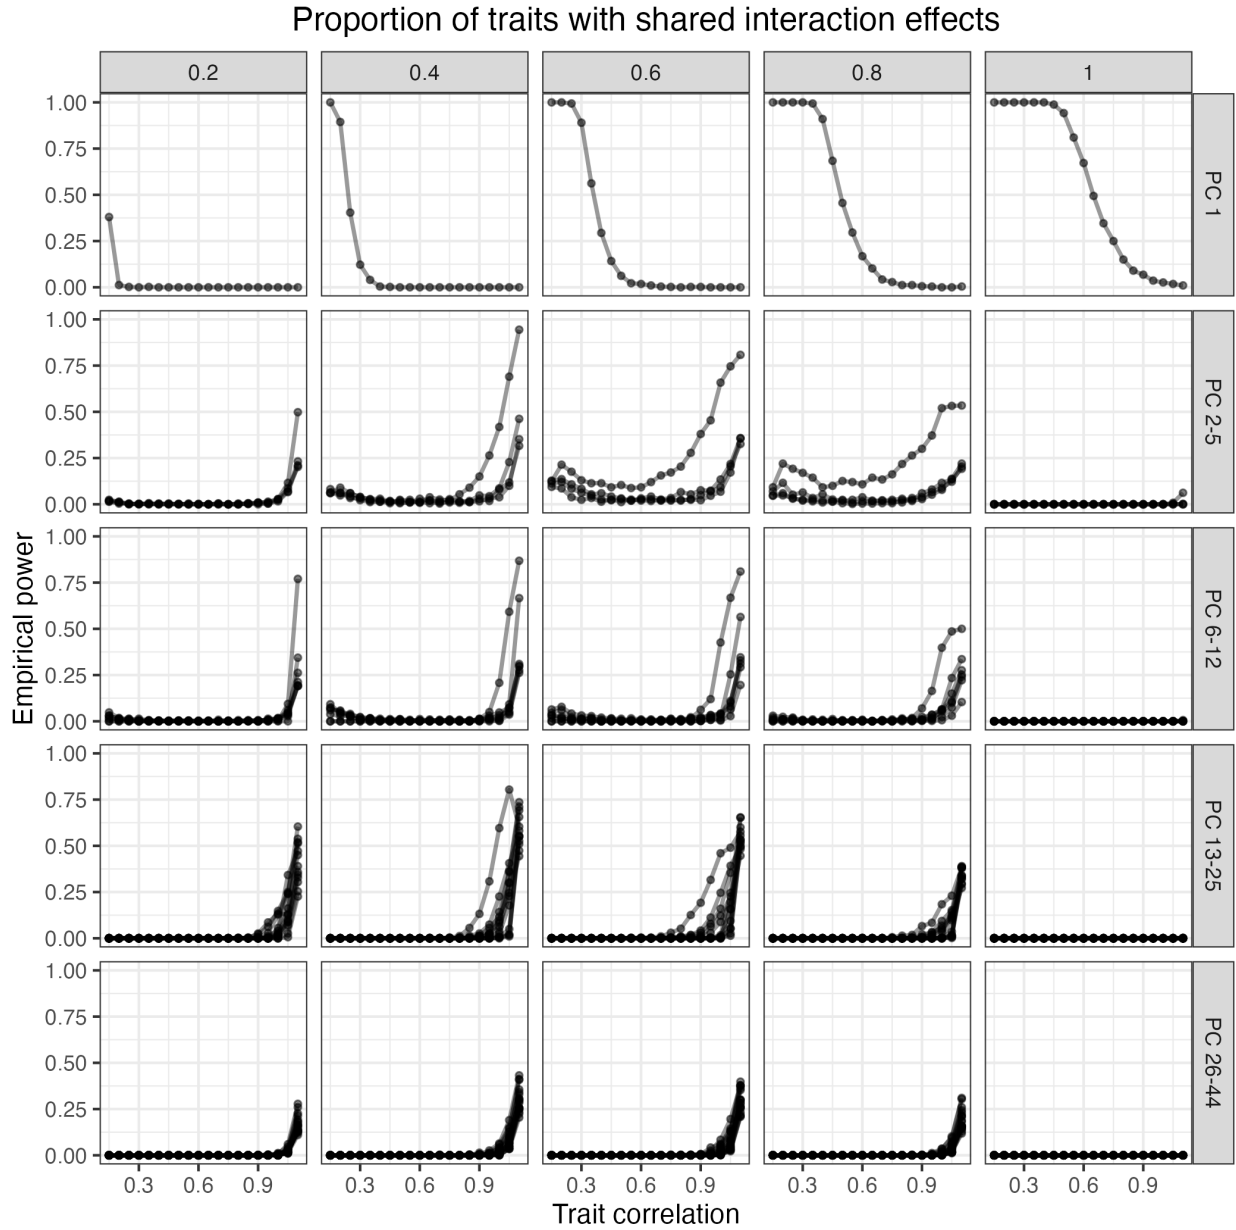

**Figure S5:** The empirical power of the principal components (rows) for the squared residual and cross product matrix at various baseline correlations (x-axis). In total, there was 10 traits simulated and the proportion of traits with shared interaction effects (columns) was varied. Each point represents the average power across 500 simulations at a significance threshold of  $5 \times 10^{-8}$ .

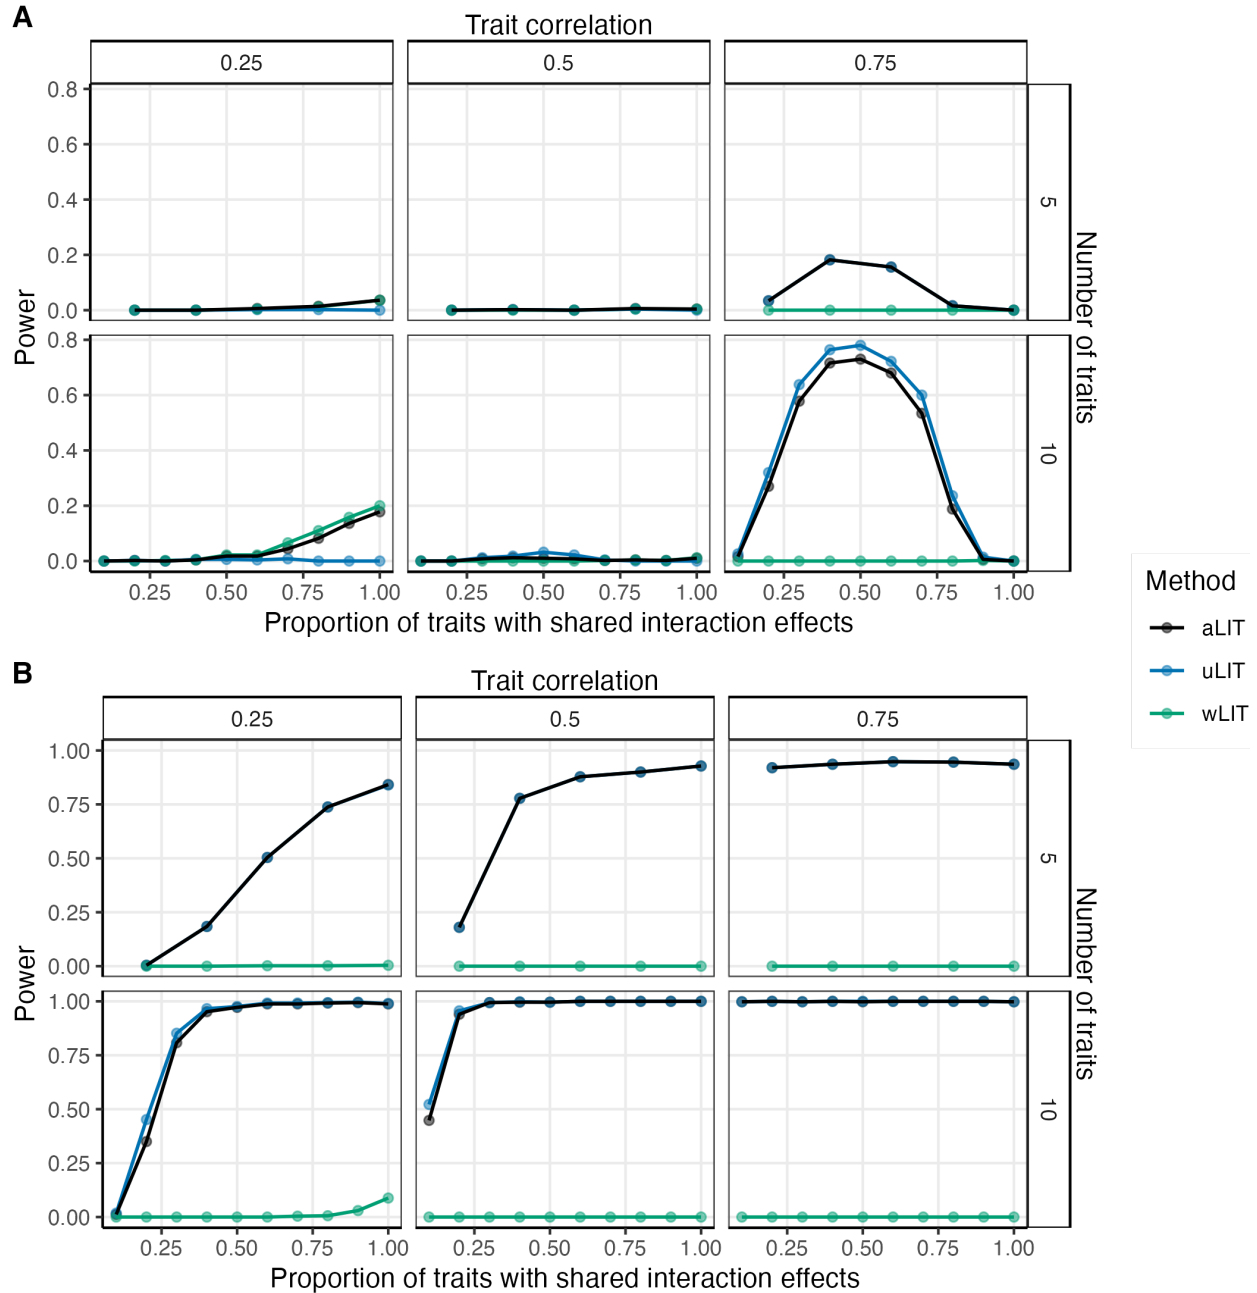

**Figure S6:** A similar simulation setting to Figure 2 with the direction of the effect size for the interaction term is opposite of the interacting environmental variable under (A) positive pleiotropy and (B) a mixture of positive and negative pleiotropy.

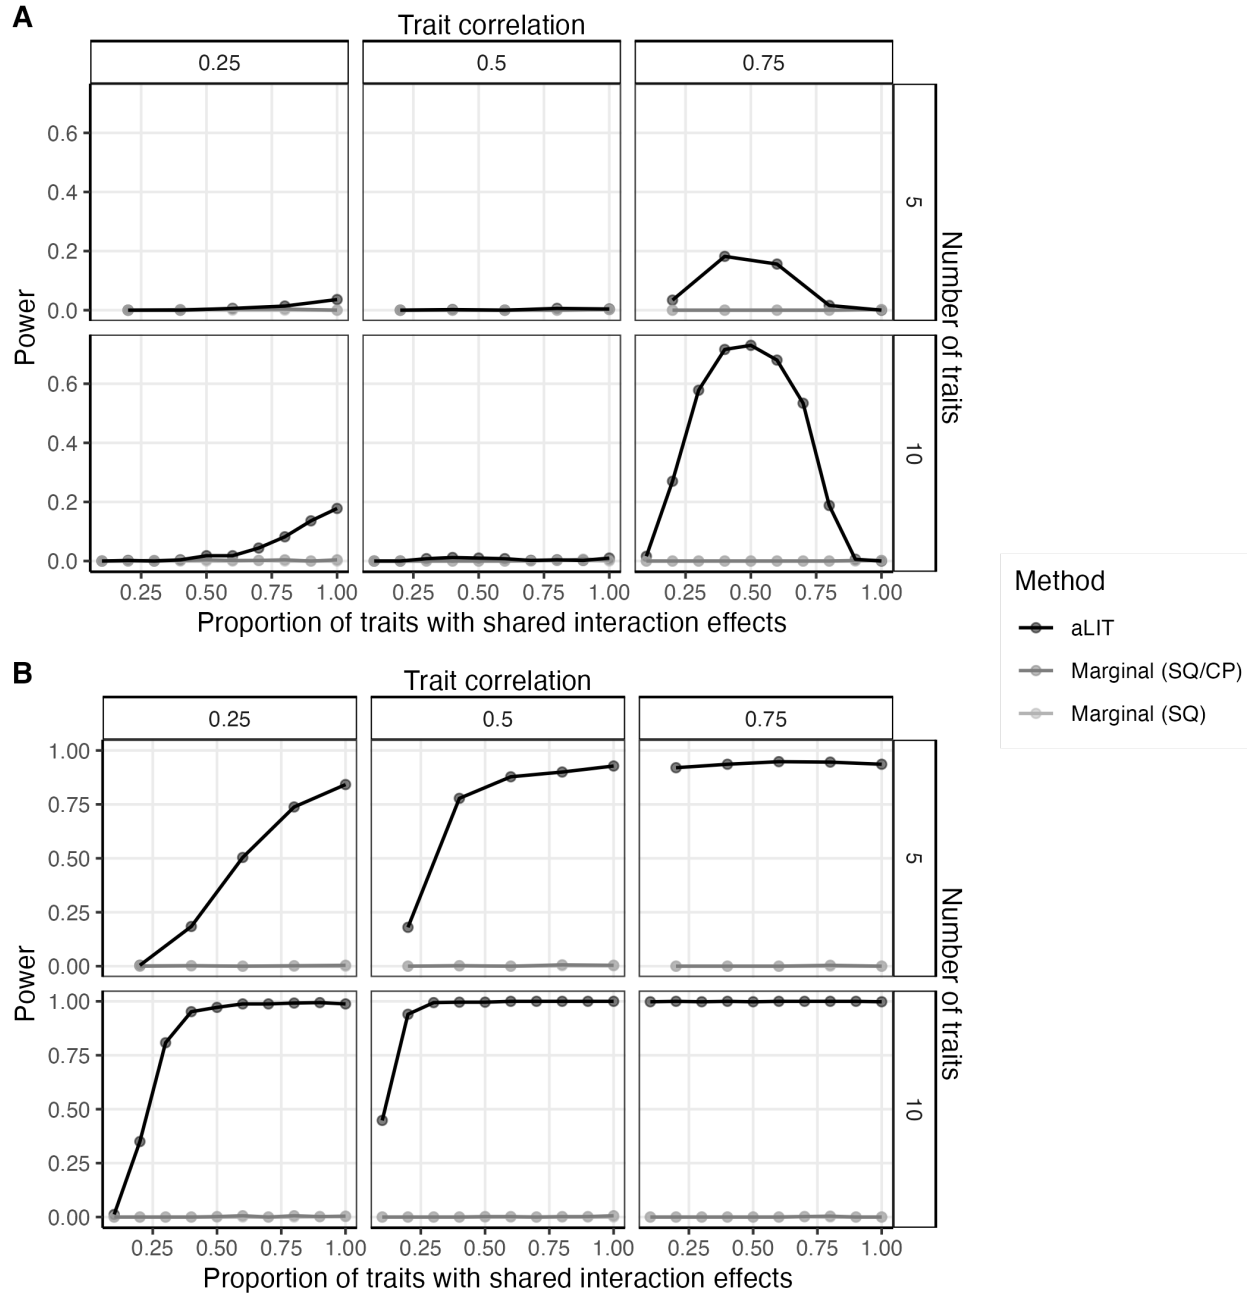

**Figure S7:** A similar simulation setting to Figure 3 with the direction of the effect size for the interaction term is opposite of the interacting environmental variable under (A) positive pleiotropy and (B) a mixture of positive and negative pleiotropy.

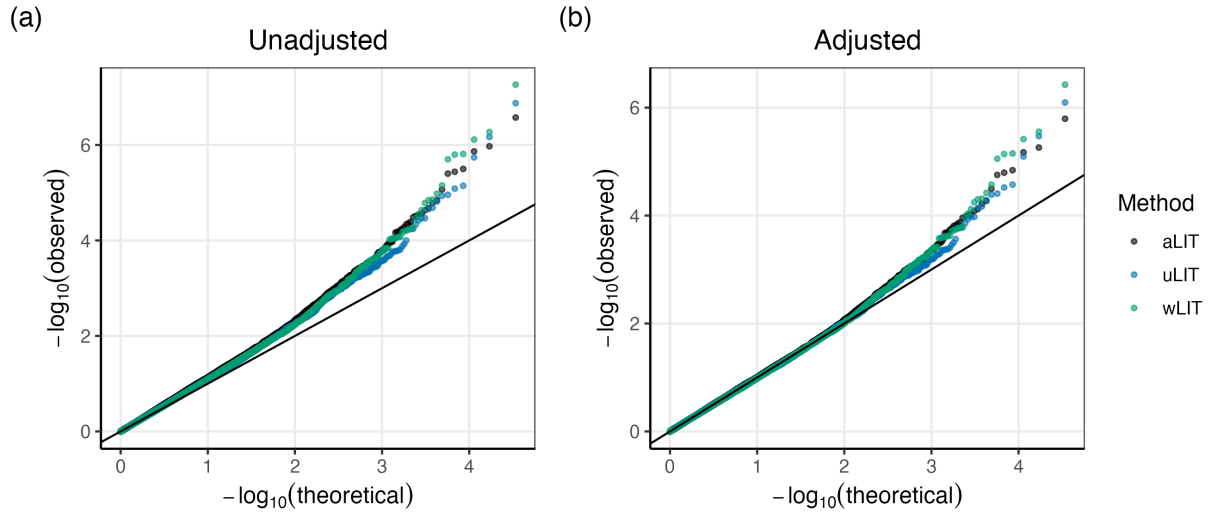

**Figure S8:** Quantile-Quantile plot of the uLIT, wLIT, and aLIT  $p$ -values from the UK Biobank. (a) The unadjusted  $p$ -values and (b) adjusted  $p$ -values using the genomic inflation factor. The figure removes significant  $p$ -values and those in strong linkage disequilibrium.

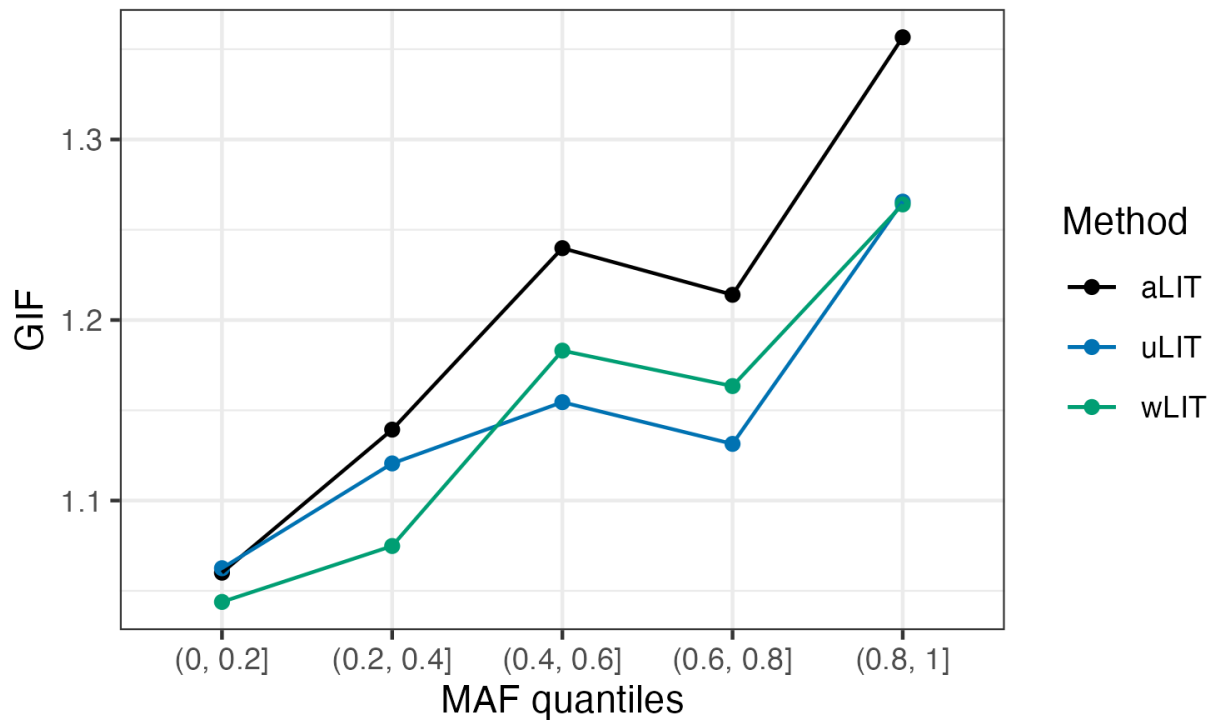

**Figure S9:** The genomic inflation factor from the UK Biobank analysis using uLIT, wLIT, and aLIT at different minor allele frequency quantiles.

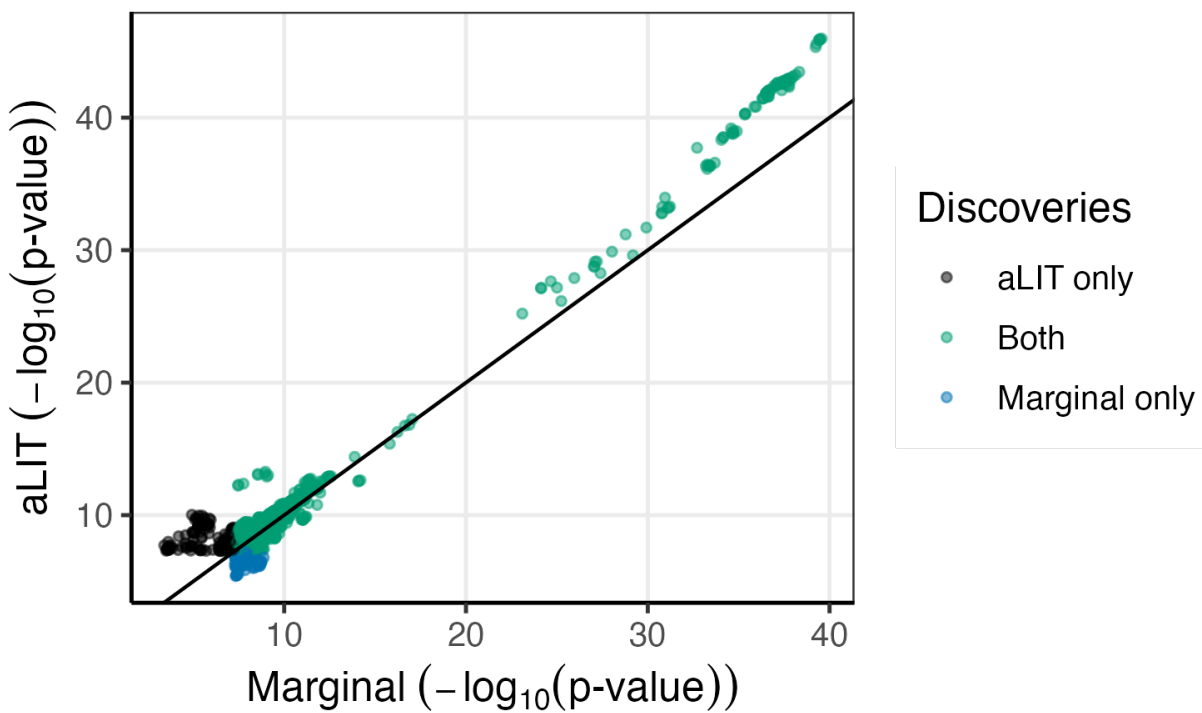

**Figure S10:** Comparison of the significance results using the marginal testing procedure and aLIT. The genome-wide significance threshold is  $5 \times 10^{-8}$ .

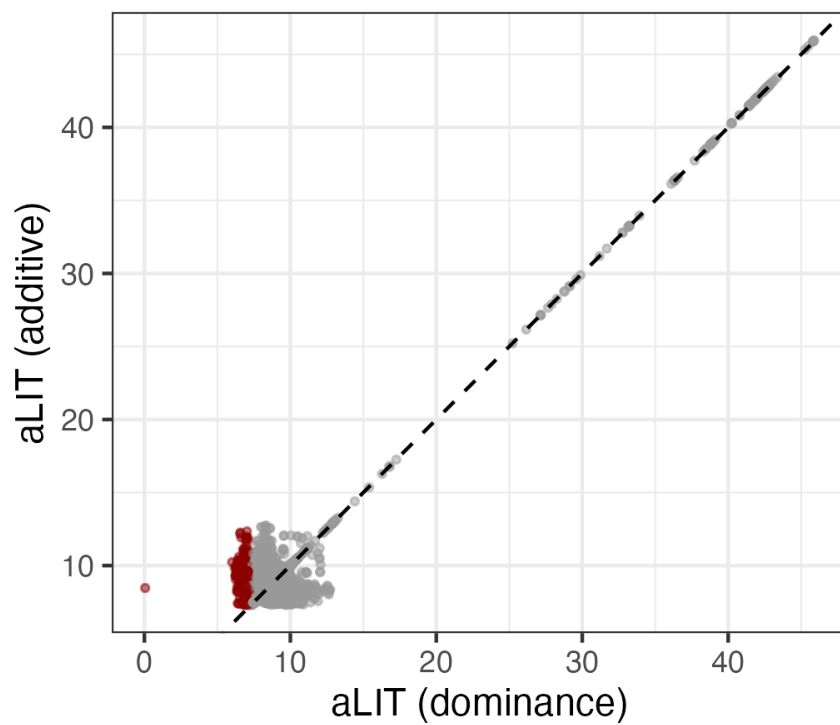

**Figure S11:** Comparison of aLIT  $p$ -values after adjusting for additive genetic effects (y-axis) and dominance/scaling effects (x-axis). The dark red points are SNPs that are above the genome-wide significance threshold of  $5 \times 10^{-8}$ . The  $p$ -values are transformed to be on a logarithmic scale similar to Figure S10.

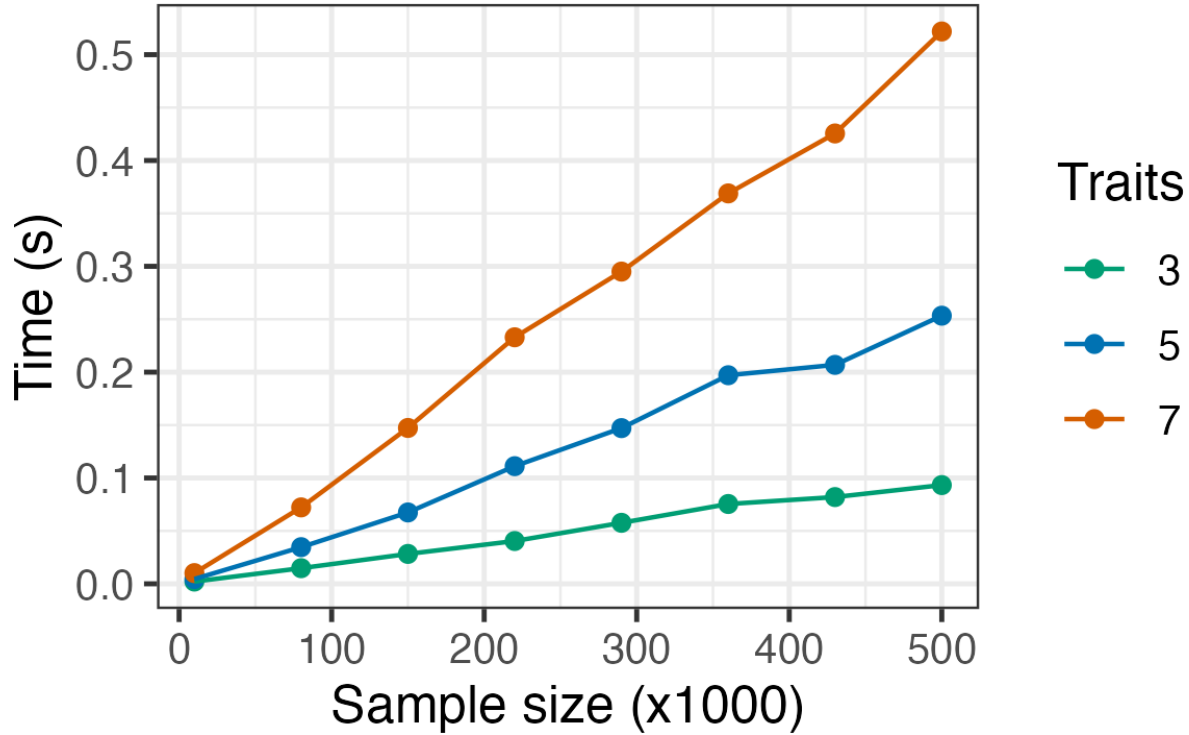

**Figure S12:** The average computational time to run aLIT on a SNP as a function of sample size and number of traits. Data were simulated the same way in the simulation study and each point is the average time across 500 replicates. Note that only a single core is used and that aLIT can distribute across multiple cores to substantially reduce the computational time.
